# Supplementary material
Source: publisher site journal article supplement (https://www.dovepress.com/article/565238)
Supplement: Supplementary file 1 [file Float%20Supplemental%20Appendix%20A%20-%20Edited.docx]

Supplemental Appendix A:

Supplemental Table A.1: Risk-of-Bias (RoB) of RCTs

|  | **Randomization process** | **Deviations from intended interventions** | **Missing outcome data** | **Measurement of the outcome** | **Selection of the reported result** | **Overall Bias** |
| --- | --- | --- | --- | --- | --- | --- |
| Total number of studies = 5 | |  |  |  |  |  |
| Low risk | 100 | 16.67 | 100 | 100 | 100 | 33.33 |
| Some concerns | 0 | 83.33 | 0 | 0 | 0 | 66.66 |
| High risk | 0 | 0 | 0 | 0 | 0 | 0 |
